# Supplementary material
Source: PubMed Central journal article supplement (PMC2884127)
Supplement: psb0502_0171SD1.pdf [file psb0502_0171SD1.pdf]

Suppl. Fig. 1

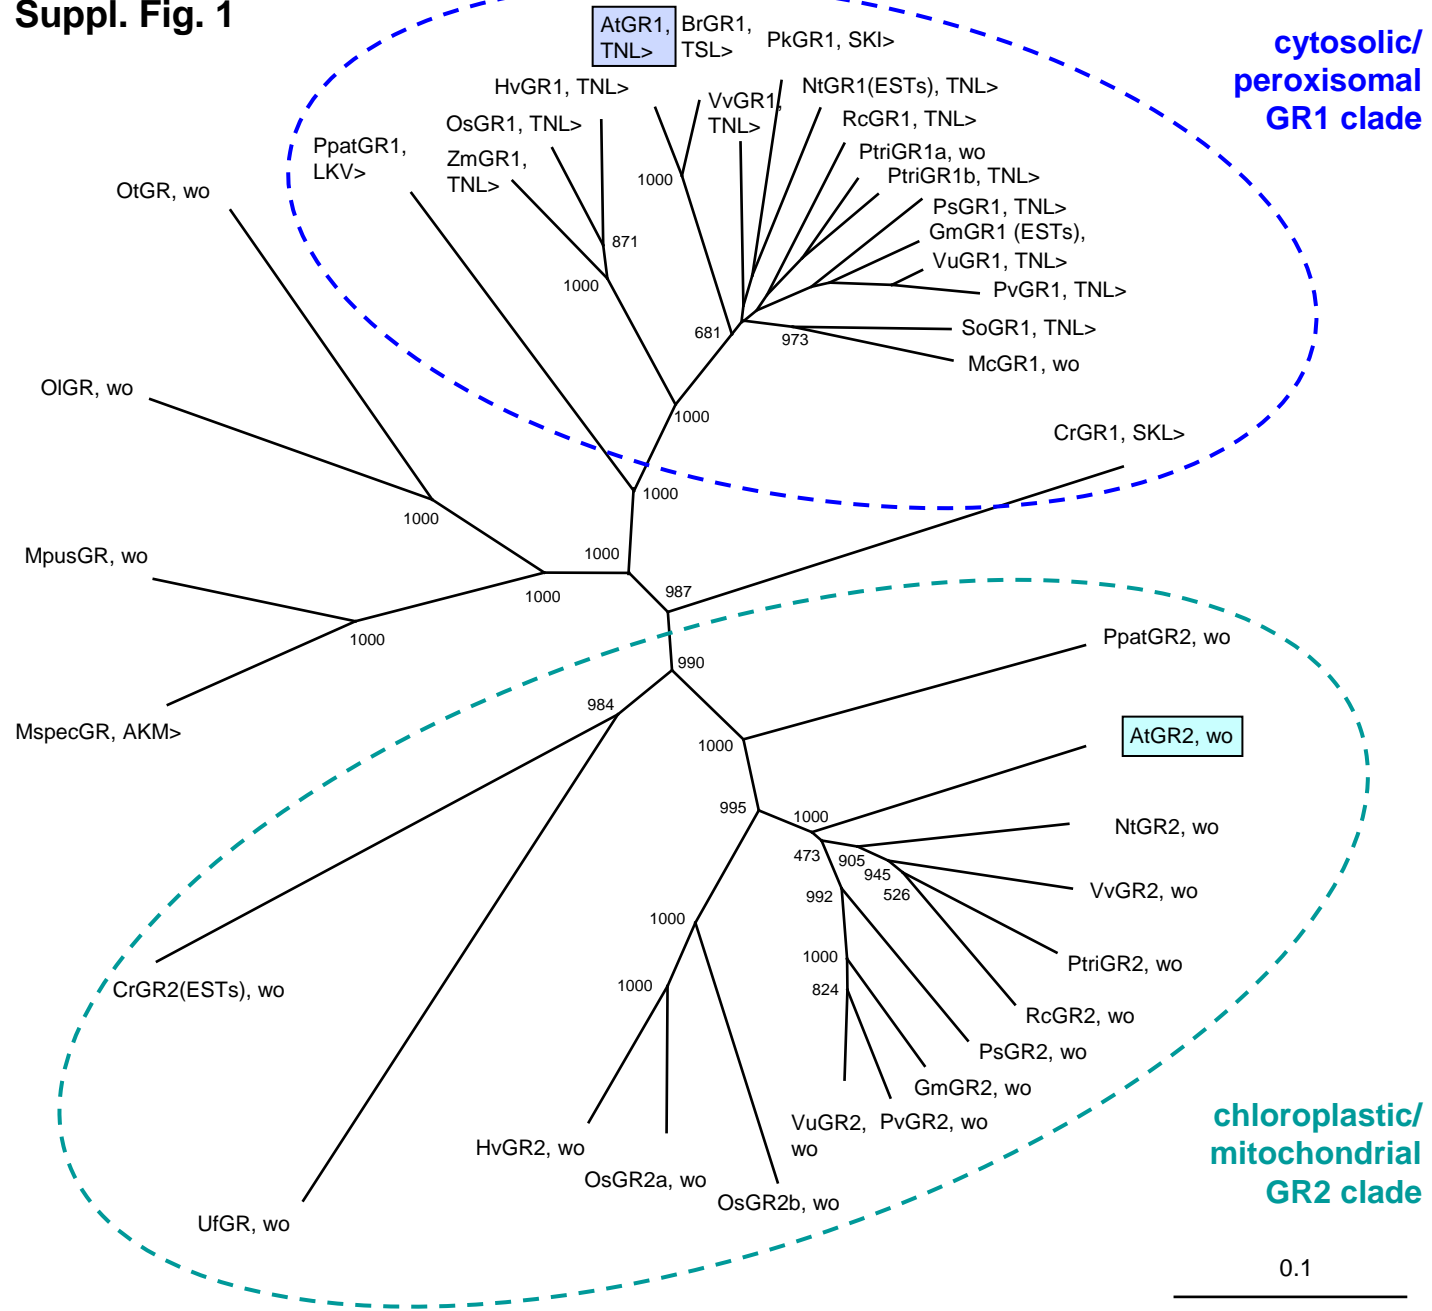

**Suppl. Fig. 1. Phylogenetic analysis of GR homologs in Viridiplantae.**

Sequences of full-length plant GR homologs or those assembled from overlapping ESTs (e.g., NtGR1(ESTs), GmGR1(ESTs), CrGR2(ESTs)) were identified by BLAST and aligned by ClustalX. The phylogenetic reconstruction was made by the neighbor-joining method using 1000 bootstraps. The tripeptide sequence of predicted PTS1 tripeptides is indicated. Additional species as compared to those mentioned in the legend of Fig. 1 are abbreviated as follows: Gm, *Glycine max*; Hv, *Hordeum vulgare* subsp. *vulgare*; Mc, *Mesembryanthemum crystallinum*; Mpus, *Micromonas pusilla* CCMP1545; Ol, *Ostreococcus lucimarinus* CCE9901; Ot, *Ostreococcus tauri*; Pv, *Phaseolus vulgaris*; So, *Spinacia oleracea*; Uf, *Ulva fasciata*; Vu, *Vigna unguiculata*.

**Suppl. Table I: Arabidopsis gene models terminating with TNL>.**

| AGI code        | Annotation                       | C-terminal 15 aa        | Size (aa) |
|-----------------|----------------------------------|-------------------------|-----------|
| At1g80300.1     | Nucleotide transporter 1         | ESPSSSPEKSAP <b>TNL</b> | 624       |
| At1g80745.1     | Unknown protein                  | APLDNEDGVTKT <b>TNL</b> | 102       |
| At3g24170.1/2/3 | Glutathione-disulfide reductase  | VTRRIAHKPKPK <b>TNL</b> | 499       |
| At3g31900.1     | Unknown protein                  | RKFLNVEADGPT <b>TNL</b> | 393       |
| At4g01026.1     | Unknown protein                  | ASNGYREKNHTE <b>TNL</b> | 211       |
| At4g09820.1     | Transparent testa 8              | VKRAIHQVIIHD <b>TNL</b> | 518       |
| At5g36700.3     | 2-Phosphoglycolate phosphatase 1 | GGCKTLLVLSGI <b>TNL</b> | 332       |
| At5g41765.1     | Unknown protein                  | PQISFNNSEPKK <b>TNL</b> | 152       |
